# Supplementary material for: Electroacupuncture Treatment Alleviates Central Poststroke Pain by Inhibiting Brain Neuronal Apoptosis and Aberrant Astrocyte Activation
Source: Neural Plast. 2016 Sep 27;2016:1437148. doi: 10.1155/2016/1437148 (PMC5059615; doi:10.1155/2016/1437148)
Supplement: Supplementary file 1 — Measurement of brain neuropathological changes and pain-related behavioral responses (within 7 days) in CPSP rats. [file 1437148.f1.doc]

**Electroacupuncture treatment alleviates central post-stroke pain by inhibiting brain neuronal apoptosis and aberrant astrocyte activation**

Gui-Hua Tian1,3,4, #, Shan-Shan Tao2, #, Man-Tang Chen2, Yu-Sang Li2, You-Ping Li4, Hong-Cai Shang1, Xiao-Yi Tang1,3, Jian-Xin Chen1, He-Bin Tang2,*

Sponsorships or competing interests that may be relevant to content are disclosed at the end of this article.

1 Key Laboratory of Chinese Internal Medicine of MOE, Beijing Dongzhimen Hospital, Beijing University of Chinese Medicine, 100700 Beijing, China (http://www.bucm.edu.cn/);

2 Department of Pharmacology, School of Pharmaceutical Sciences, South-Central University for Nationalities, No. 182, Minyuan Road, 430074 Wuhan, China (http://www.scuec.edu.cn/);

3 Department of Tuina and Pain, Beijing Dongzhimen Hospital, Beijing University of Chinese Medicine, 100700 Beijing, China (http://www.bucm.edu.cn/);

4 Chinese Evidence-based Medicine Center, West China Hospital, Sichuan University, 610041 Sichuan, China (http://www.scu.edu.cn/);

*Correspondence author. Address: Department of Pharmacology, School of Pharmaceutical Sciences, South-Central University for Nationalities, No. 182, Minyuan Road, 430074 Wuhan, China. Tel/Fax: +86 27 6784 2332. E-mail address: [hbtang2006@mail.scuec.edu.cn](mailto:hbtang2006@mail.scuec.edu.cn) (H. -B. Tang).

#G.H.T. and S.S.T. contributed equally to this work.

**Supplemental Figure and its legend**

**
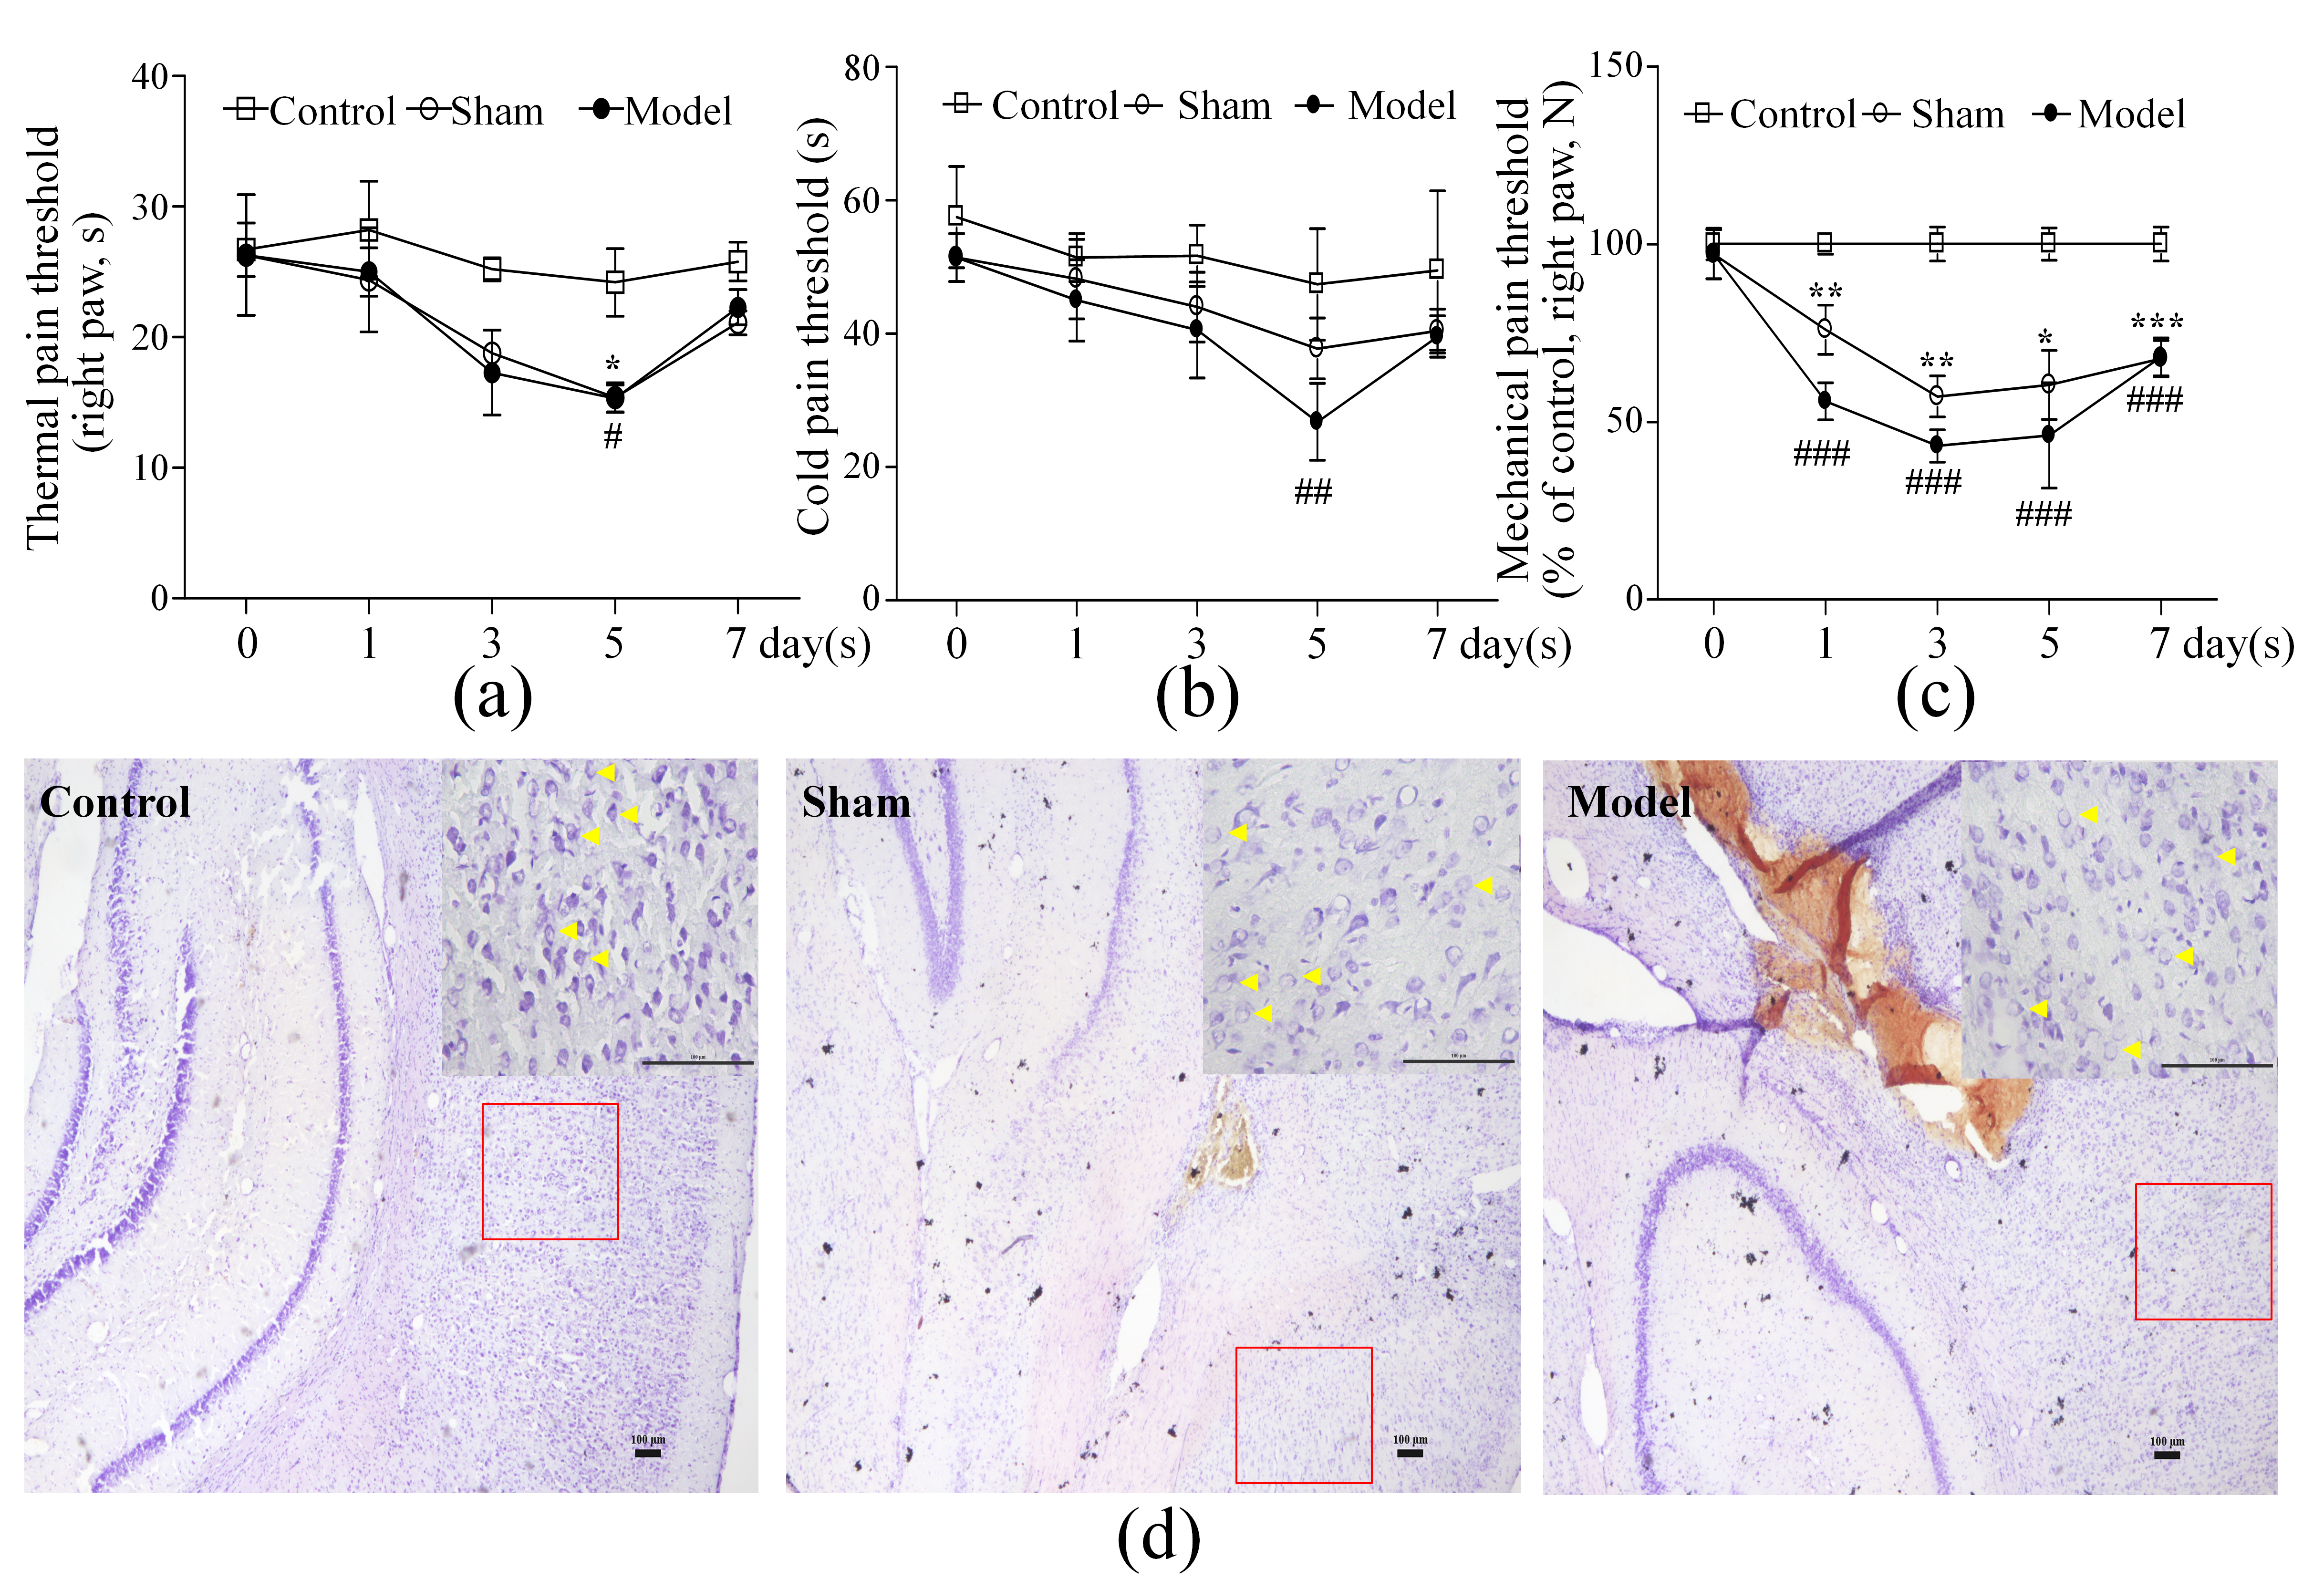
**

FIGURE I. Measurement of brain neuropathological changes and pain-related behavioral responses in CPSP rats.Changes of thermal (A), cold (B) and mechanical (C) hyperalgesia within 7 days in the contralateral paw of CPSP rats. (D) Representative photomicrographs of brain nissl staining in CPSP rats (half amount of rats in each group) on the 5th day after the operation. Yellow arrows denote neuronal cells of the brain sections. Nissl-stained normal neuronal cell bodies exhibit a bright violet colour. *,**,*** denote *p* < 0.05, 0.01, 0.001 versus the control, and #, ##, ### denote *p* < 0.05, 0.01, 0.001 versus the model (n = 5 in each group;two-way analysis of variance, followed by Bonferroni *post hoc* test), respectively.
